# Supplementary material for: Transcriptome-Based WGCNA Analysis Reveals Regulated Metabolite Fluxes between Floral Color and Scent in Narcissus tazetta Flower
Source: MDPI journal article supplement (doi:10.3390/ijms22158249), 2021-07-31
Supplement: s1 [file s1]

Supplementary Table S1 Functional enrichment analysis of the transcription factor specific module of paracrown

| Sample | module   | GO_term                                                            | GO_ID       | Items | Background<br>Items | P_adj    | Pvalue                |
|--------|----------|--------------------------------------------------------------------|-------------|-------|---------------------|----------|-----------------------|
| C1     | brown    | Transcription                                                      | GO: 0006351 | 15    | 399                 | 0        | 0                     |
|        |          | Regulation of transcription                                        | GO: 0006355 | 42    | 1472                | 0        | 0                     |
|        |          | Radial pattern formation                                           | GO: 0009956 | 3     | 12                  | 0.000372 | 2.42×10 <sup>-6</sup> |
|        |          | Regulation of cellular process                                     | GO: 0050794 | 7     | 343                 | 0.002058 | 1.34×10 <sup>-5</sup> |
|        |          | Maintenance of protein location in<br>nucleus                      | GO: 0051457 | 2     | 3                   | 0.002327 | 1.51×10 <sup>-5</sup> |
|        |          | Defense response signaling pathway,<br>resistance gene-independent | GO: 0010204 | 3     | 49                  | 0.029323 | 0.00019               |
|        |          | Response to stimulus                                               | GO: 0050896 | 6     | 372                 | 0.031549 | 0.000205              |
|        |          | Defense response signaling pathway,<br>resistance gene-dependent   | GO: 0009870 | 3     | 52                  | 0.035001 | 0.000227              |
|        |          | Defense response to fungus                                         | GO: 0050832 | 5     | 245                 | 0.037329 | 0.000242              |
| C2     | darkgrey | Response to lipid                                                  | GO: 0033993 | 2     | 7                   | 0.000385 | 5.42×10 <sup>-6</sup> |
|        |          | Transcription                                                      | GO: 0006351 | 4     | 399                 | 0.003522 | 4.96×10 <sup>-5</sup> |
|        |          | Regulation of transcription                                        | GO: 0006355 | 6     | 1472                | 0.00565  | 7.96×10 <sup>-5</sup> |

|    |               |                                                             |             |    |      |                        |                        |
|----|---------------|-------------------------------------------------------------|-------------|----|------|------------------------|------------------------|
| C3 |               | Positive regulation of transcription                        | GO: 0045893 | 4  | 459  | 0.006056               | 8.53×10 <sup>-5</sup>  |
|    |               | Regulation of removal of superoxide radicals                | GO: 2000121 | 1  | 1    | 0.037003               | 0.000521               |
|    | tan           | Regulation of transcription                                 | GO: 0006355 | 14 | 1472 | 7.72×10 <sup>-11</sup> | 1.02×10 <sup>-12</sup> |
|    |               | Transcription                                               | GO: 0006351 | 6  | 399  | 4.12×10 <sup>-5</sup>  | 5.42×10 <sup>-7</sup>  |
|    | black         | Regulation of transcription                                 | GO: 0006355 | 25 | 1472 | 1.27×10 <sup>-23</sup> | 1.34×10 <sup>-25</sup> |
|    |               | Auxin-activated signaling pathway                           | GO: 0009734 | 9  | 237  | 2.73×10 <sup>-10</sup> | 2.87×10 <sup>-12</sup> |
|    |               | Cellular response to osmotic stress                         | GO: 0071470 | 3  | 15   | 4.51×10 <sup>-5</sup>  | 4.75×10 <sup>-7</sup>  |
|    |               | Response to fungus                                          | GO: 0009620 | 4  | 87   | 0.000202               | 2.13×10 <sup>-6</sup>  |
|    |               | Response to hormone                                         | GO: 0009725 | 4  | 115  | 0.000616               | 6.48×10 <sup>-6</sup>  |
|    |               | Post-translational protein modification                     | GO: 0043687 | 4  | 116  | 0.000637               | 6.71×10 <sup>-6</sup>  |
|    |               | Transcription                                               | GO: 0006351 | 5  | 399  | 0.005551               | 5.84×10 <sup>-5</sup>  |
|    |               | Anthocyanin accumulation in tissues in response to UV light | GO: 0043481 | 3  | 118  | 0.024564               | 0.000259               |
|    |               | Regulation of cellular process                              | GO: 0050794 | 4  | 343  | 0.042503               | 0.000447               |
|    | darkturquoise | Regulation of transcription                                 | GO: 0006355 | 6  | 1472 | 0.00011                | 5.49×10 <sup>-6</sup>  |
|    |               | Transcription                                               | GO: 0006351 | 4  | 399  | 0.000175               | 8.76×10 <sup>-6</sup>  |
|    |               | Cellular biosynthetic process                               | GO: 0044249 | 2  | 172  | 0.031877               | 0.001594               |
|    |               | Organonitrogen compound biosynthetic process                | GO: 1901566 | 1  | 6    | 0.04166                | 0.002083               |
| C4 | blue          | Transcription                                               | GO: 0006351 | 20 | 399  | 0                      | 0                      |

|    |              |                                                |             |    |      |                        |                        |
|----|--------------|------------------------------------------------|-------------|----|------|------------------------|------------------------|
| P0 |              | Regulation of transcription                    | GO: 0006355 | 92 | 1472 | 1.06E-81               | 4.6×10 <sup>-84</sup>  |
|    |              | Cellular response to osmotic stress            | GO: 0071470 | 3  | 15   | 0.008145               | 3.53×10 <sup>-5</sup>  |
|    |              | Positive regulation of transcription           | GO: 0045893 | 10 | 459  | 0.008284               | 3.59×10 <sup>-5</sup>  |
|    |              | Response to oxygen-containing compound         | GO: 1901700 | 5  | 93   | 0.012862               | 5.57×10 <sup>-5</sup>  |
|    |              | Response to hormone                            | GO: 0009725 | 5  | 115  | 0.035172               | 0.000152               |
|    |              | Post-translational protein modification        | GO: 0043687 | 5  | 116  | 0.036628               | 0.000159               |
|    | green yellow | Regulation of transcription                    | GO: 0006355 | 19 | 1472 | 6.22×10 <sup>-17</sup> | 1.02×10 <sup>-18</sup> |
|    |              | Actin filament bundle assembly                 | GO: 0051017 | 2  | 41   | 0.03589                | 0.000588               |
|    | turquoise    | Transcription                                  | GO: 0006351 | 23 | 399  | 0                      | 0                      |
|    |              | Regulation of transcription                    | GO: 0006355 | 93 | 1472 | 1.2×10 <sup>-81</sup>  | 4.95×10 <sup>-84</sup> |
|    |              | Determination of bilateral symmetry            | GO: 0009855 | 9  | 143  | 4.47×10 <sup>-6</sup>  | 1.85×10 <sup>-8</sup>  |
|    |              | Polarity specification of adaxial/abaxial axis | GO: 0009944 | 8  | 104  | 5.87×10 <sup>-6</sup>  | 2.42×10 <sup>-8</sup>  |
|    |              | Primary shoot apical meristem specification    | GO: 0010072 | 7  | 115  | 0.000223               | 9.22×10 <sup>-7</sup>  |
|    |              | Post-translational protein modification        | GO: 0043687 | 7  | 116  | 0.000236               | 9.77×10 <sup>-7</sup>  |
|    |              | Integument development                         | GO: 0080060 | 4  | 18   | 0.000272               | 1.12×10 <sup>-6</sup>  |
|    |              | Positive regulation of transcription           | GO: 0045893 | 12 | 459  | 0.000297               | 1.23×10 <sup>-6</sup>  |
|    |              | Auxin-activated signaling pathway              | GO: 0009734 | 8  | 237  | 0.003017               | 1.25×10 <sup>-5</sup>  |
|    |              | Radial pattern formation                       | GO: 0009956 | 3  | 12   | 0.004531               | 1.87×10 <sup>-5</sup>  |

|    |               |                                                |             |    |      |                        |                        |
|----|---------------|------------------------------------------------|-------------|----|------|------------------------|------------------------|
|    |               | Response to anoxia                             | GO: 0034059 | 2  | 2    | 0.004803               | $1.98 \times 10^{-5}$  |
|    |               | Cellular response to osmotic stress            | GO: 0071470 | 3  | 15   | 0.009279               | $3.83 \times 10^{-5}$  |
|    |               | Flower morphogenesis                           | GO: 0048439 | 5  | 90   | 0.013162               | $5.44 \times 10^{-5}$  |
|    |               | Negative regulation of cell proliferation      | GO: 0008285 | 3  | 17   | 0.013777               | $5.69 \times 10^{-5}$  |
|    |               | Fruit dehiscence                               | GO: 0010047 | 3  | 18   | 0.016478               | $6.81 \times 10^{-5}$  |
|    |               | Regulation of shoot system development         | GO: 0048831 | 3  | 21   | 0.026593               | 0.00011                |
|    |               | Leaf senescence                                | GO: 0010150 | 4  | 58   | 0.032754               | 0.000135               |
|    |               | Negative regulation of biological process      | GO: 0048519 | 4  | 62   | 0.042471               | 0.000175               |
| P1 | midnight blue | Regulation of transcription                    | GO: 0006355 | 12 | 1472 | $1.26 \times 10^{-10}$ | $5.03 \times 10^{-12}$ |
|    |               | Response to hormone                            | GO: 0009725 | 3  | 115  | 0.000962               | $3.85 \times 10^{-5}$  |
|    |               | Integument development                         | GO: 0080060 | 2  | 18   | 0.001185               | $4.74 \times 10^{-5}$  |
|    |               | Auxin-activated signaling pathway              | GO: 0009734 | 3  | 237  | 0.008154               | 0.000326               |
|    |               | Embryonic pattern specification                | GO: 0009880 | 2  | 99   | 0.036545               | 0.001462               |
|    |               | Transcription                                  | GO: 0006351 | 3  | 399  | 0.036825               | 0.001473               |
|    |               | Polarity specification of adaxial/abaxial axis | GO: 0009944 | 2  | 104  | 0.04028                | 0.001611               |
|    |               | Primary shoot apical meristem specification    | GO: 0010072 | 2  | 115  | 0.049109               | 0.001964               |

|    |       |                                              |             |    |      |                        |                        |
|----|-------|----------------------------------------------|-------------|----|------|------------------------|------------------------|
| P2 | green | Regulation of transcription                  | GO: 0006355 | 25 | 1472 | $1.05 \times 10^{-22}$ | $1.5 \times 10^{-24}$  |
|    |       | Transcription                                | GO: 0006351 | 6  | 399  | 0.000374               | $5.34 \times 10^{-6}$  |
|    |       | Stomatal complex morphogenesis               | GO: 0010103 | 4  | 139  | 0.001267               | $1.81 \times 10^{-5}$  |
|    |       | Trichome morphogenesis                       | GO: 0010090 | 4  | 257  | 0.013727               | 0.000196               |
| P3 | pink  | Regulation of transcription                  | GO: 0006355 | 18 | 1472 | $1.83 \times 10^{-5}$  | $3.05 \times 10^{-17}$ |
|    |       | Transcription                                | GO: 0006351 | 5  | 399  | 0.001416               | $2.36 \times 10^{-5}$  |
|    |       | Response to hormone                          | GO: 0009725 | 3  | 115  | 0.00832                | 0.000139               |
|    |       | Aromatic compound biosynthetic process       | GO: 0019438 | 2  | 25   | 0.013029               | 0.000217               |
|    |       | Regulation of cellular process               | GO: 0050794 | 4  | 343  | 0.01316                | 0.000219               |
|    |       | Organic cyclic compound biosynthetic process | GO: 1901362 | 2  | 33   | 0.02283                | 0.000381               |
| P4 | red   | Regulation of transcription                  | GO: 0006355 | 34 | 1472 | $3.78 \times 10^{-35}$ | $7.56 \times 10^{-37}$ |
|    |       | Transcription                                | GO: 0006351 | 6  | 399  | 0.000561               | $1.12 \times 10^{-5}$  |

Supplementary Table S2 Transcription factors in the top 30% Hub genes of modules related to floral pigment and floral fragrance formation

| Sample | Module  | GeneID            | Family  |
|--------|---------|-------------------|---------|
| C3     | yellow  | c113566.graph_c0  | AP2/ERF |
|        | yellow  | c115565.graph_c0  | bZIP    |
|        | yellow  | c111165/f1p0/3679 | GARP    |
|        | yellow  | c3312/f1p0/1393   | HB      |
|        | yellow  | c78506.graph_c0   | HB      |
|        | yellow  | c111781.graph_c0  | LOB     |
|        | yellow  | c109881.graph_c0  | LOB     |
|        | yellow  | c12422/f2p1/1484  | MYB     |
|        | yellow  | c122194.graph_c0  | MYB     |
|        | yellow  | c110400.graph_c0  | MYB     |
|        | yellow  | c123531.graph_c1  | NAC     |
|        | yellow  | c26651/f1p0/1318  | PLATZ   |
|        | yellow  | c50868/f1p1/2479  | WD40    |
| P1     | yellow  | c88692.graph_c0   | ZF      |
|        | bisque4 | c115272.graph_c0  | AP2/ERF |
|        | bisque4 | c38849.graph_c0   | AP2/ERF |
|        | bisque4 | c114283.graph_c0  | AP2/ERF |
|        | bisque4 | c112446.graph_c0  | AP2/ERF |
|        | bisque4 | c101703.graph_c0  | B3      |
|        | bisque4 | c17677/f1p0/1250  | BBR     |
|        | bisque4 | c45912.graph_c0   | bHLH    |
|        | bisque4 | c119890.graph_c0  | bHLH    |
|        | bisque4 | c20405/f1p0/1640  | bZIP    |
|        | bisque4 | c3099/f1p8/1864   | bZIP    |
|        | bisque4 | c108797.graph_c0  | bZIP    |
|        | bisque4 | c38896/f1p1/1760  | C2C2    |
|        | bisque4 | c17081/f1p0/1503  | C2C2    |
|        | bisque4 | c106647.graph_c0  | C2C2    |
|        | bisque4 | c103341.graph_c0  | C2C2    |
|        | bisque4 | c119142.graph_c0  | C2H2    |
|        | bisque4 | c116644.graph_c1  | C2H2    |
|        | bisque4 | c114645.graph_c0  | C2H2    |
|        | bisque4 | c120999.graph_c0  | C3H     |
|        | bisque4 | c114457.graph_c0  | C3H     |
|        | bisque4 | c23113/f1p1/1494  | MYB     |
|        | bisque4 | c9225/f4p2/1499   | MYB     |
|        | bisque4 | c125126.graph_c0  | MYB     |
|        | bisque4 | c106256.graph_c0  | MYB     |
|        | bisque4 | c44176.graph_c0   | MYB     |
|        | bisque4 | c103435.graph_c0  | NAC     |

|    |         |                   |         |
|----|---------|-------------------|---------|
|    | bisque4 | c110425.graph_c0  | NAC     |
|    | bisque4 | c3131/f1p0/1551   | NF      |
|    | bisque4 | c114160.graph_c0  | NF      |
|    | bisque4 | c108405.graph_c0  | OFp     |
|    | bisque4 | c107896/f1p0/3456 | S1Fa    |
|    | bisque4 | c112561.graph_c0  | SBP     |
|    | bisque4 | c95432.graph_c0   | SBP     |
|    | bisque4 | c112166.graph_c0  | SBP     |
|    | bisque4 | c24298/f1p0/1887  | TCP     |
|    | bisque4 | c120592.graph_c0  | ZF      |
| P3 | brown4  | c47831/f1p0/2554  | AP2/ERF |
|    | brown4  | c112584.graph_c0  | AP2/ERF |
|    | brown4  | c128472.graph_c0  | AP2/ERF |
|    | brown4  | c89954.graph_c0   | AP2/ERF |
|    | brown4  | c116432.graph_c0  | AP2/ERF |
|    | brown4  | c44698.graph_c0   | B3      |
|    | brown4  | c28841/f1p0/2147  | bHLH    |
|    | brown4  | c68212/f1p1/2519  | bHLH    |
|    | brown4  | c104883/f1p0/3411 | bHLH    |
|    | brown4  | c18545/f1p0/1492  | bHLH    |
|    | brown4  | c119116.graph_c0  | bHLH    |
|    | brown4  | c99947.graph_c0   | bHLH    |
|    | brown4  | c78553.graph_c0   | bHLH    |
|    | brown4  | c4999/f1p0/1943   | bZIP    |
|    | brown4  | c4492/f1p1/1394   | bZIP    |
|    | brown4  | c18042/f1p0/1260  | bZIP    |
|    | brown4  | c38140/f1p1/1562  | bZIP    |
|    | brown4  | c106708.graph_c0  | bZIP    |
|    | brown4  | c100911.graph_c0  | bZIP    |
|    | brown4  | c120609.graph_c0  | bZIP    |
|    | brown4  | c114078.graph_c0  | bZIP    |
|    | brown4  | c111846.graph_c0  | bZIP    |
|    | brown4  | c106657.graph_c0  | C2C2    |
|    | brown4  | c111269.graph_c0  | C2H2    |
|    | brown4  | c109204.graph_c0  | C2H2    |
|    | brown4  | c14695/f1p1/1708  | E2F     |
|    | brown4  | c18739/f1p0/1744  | GARP    |
|    | brown4  | c117164.graph_c0  | GARP    |
|    | brown4  | c26500/f1p0/2093  | GRAS    |
|    | brown4  | c14406/f1p0/1538  | HB      |
|    | brown4  | c62685/f1p4/2588  | HB      |
|    | brown4  | c24359/f1p0/1573  | HB      |
|    | brown4  | c70931/f1p0/2659  | HB      |
|    | brown4  | c105951.graph_c0  | HB      |

|    |        |                   |         |
|----|--------|-------------------|---------|
|    | brown4 | c123323.graph_c0  | HB      |
|    | brown4 | c110700/f1p0/3535 | MYB     |
|    | brown4 | c16798/f1p0/1420  | MYB     |
|    | brown4 | c12422/f2p1/1484  | MYB     |
|    | brown4 | c115475.graph_c0  | MYB     |
|    | brown4 | c95617.graph_c1   | MYB     |
|    | brown4 | c115335.graph_c0  | MYB     |
|    | brown4 | c103885.graph_c0  | MYB     |
|    | brown4 | c48011/f1p0/2620  | NAC     |
|    | brown4 | c13238/f2p0/1653  | NAC     |
|    | brown4 | c3490/f1p3/1647   | NAC     |
|    | brown4 | c18463/f1p0/1184  | NAC     |
|    | brown4 | c120112.graph_c1  | NAC     |
|    | brown4 | c120475.graph_c1  | NAC     |
|    | brown4 | c120475.graph_c0  | NAC     |
|    | brown4 | c116889.graph_c0  | NF      |
|    | brown4 | c117231.graph_c0  | OFP     |
|    | brown4 | c99833.graph_c0   | OFP     |
|    | brown4 | c26651/f1p0/1318  | PLATZ   |
|    | brown4 | c86440.graph_c0   | PLATZ   |
|    | brown4 | c113435.graph_c0  | Tify    |
|    | brown4 | c10900/f2p0/1623  | ULT     |
|    | brown4 | c4425/f1p1/1606   | WD40    |
|    | brown4 | c8058/f2p0/1919   | WRKY    |
|    | brown4 | c100391.graph_c0  | WRKY    |
|    | brown4 | c109107/f1p0/3571 | ZF      |
|    | brown4 | c104859.graph_c0  | ZF      |
| P4 | coral1 | c2036/f3p0/1600   | AP2/ERF |
|    | coral1 | c47831/f1p0/2554  | AP2/ERF |
|    | coral1 | c11421/f2p1/2051  | AP2/ERF |
|    | coral1 | c116432.graph_c0  | AP2/ERF |
|    | coral1 | c120995.graph_c0  | AP2/ERF |
|    | coral1 | c102297.graph_c0  | AP2/ERF |
|    | coral1 | c104883/f1p0/3411 | bHLH    |
|    | coral1 | c18545/f1p0/1492  | bHLH    |
|    | coral1 | c13244/f2p2/1422  | bHLH    |
|    | coral1 | c121995.graph_c0  | bHLH    |
|    | coral1 | c18042/f1p0/1260  | bZIP    |
|    | coral1 | c38140/f1p1/1562  | bZIP    |
|    | coral1 | c4492/f1p1/1394   | bZIP    |
|    | coral1 | c115833.graph_c0  | bZIP    |
|    | coral1 | c120609.graph_c0  | bZIP    |
|    | coral1 | c105952.graph_c0  | bZIP    |
|    | coral1 | c21292/f1p0/1595  | C2C2    |



|        |                  |          |
|--------|------------------|----------|
| coral1 | c114771.graph_c0 | C2C2     |
| coral1 | c120161.graph_c1 | C2H2     |
| coral1 | c109204.graph_c0 | C2H2     |
| coral1 | c122144.graph_c0 | DBP      |
| coral1 | c14695/f1p1/1708 | E2F      |
| coral1 | c117164.graph_c0 | GARP     |
| coral1 | c106358.graph_c1 | GARP     |
| coral1 | c26500/f1p0/2093 | GRAS     |
| coral1 | c24359/f1p0/1573 | HB       |
| coral1 | c23536/f1p0/1779 | HB       |
| coral1 | c14406/f1p0/1538 | HB       |
| coral1 | c17089/f1p0/1242 | HB       |
| coral1 | c70931/f1p0/2659 | HB       |
| coral1 | c123323.graph_c0 | HB       |
| coral1 | c118634.graph_c0 | HB       |
| coral1 | c104894.graph_c1 | HB       |
| coral1 | c105951.graph_c0 | HB       |
| coral1 | c82867/f1p1/4332 | HSF      |
| coral1 | c98286.graph_c0  | LOB      |
| coral1 | c8658/f2p1/1443  | MYB      |
| coral1 | c20734/f1p1/1464 | MYB      |
| coral1 | c23880/f1p0/1508 | MYB      |
| coral1 | c55262.graph_c0  | MYB      |
| coral1 | c115335.graph_c0 | MYB      |
| coral1 | c98415.graph_c0  | MYB      |
| coral1 | c107671.graph_c0 | MYB      |
| coral1 | c3490/f1p3/1647  | NAC      |
| coral1 | c18463/f1p0/1184 | NAC      |
| coral1 | c39424/f1p0/1351 | NAC      |
| coral1 | c7615/f1p3/1491  | NAC      |
| coral1 | c48011/f1p0/2620 | NAC      |
| coral1 | c120475.graph_c0 | NAC      |
| coral1 | c120112.graph_c1 | NAC      |
| coral1 | c120475.graph_c1 | NAC      |
| coral1 | c120933.graph_c0 | NAC      |
| coral1 | c108608.graph_c0 | NF       |
| coral1 | c92926.graph_c0  | Trihelix |
| coral1 | c10900/f2p0/1623 | ULT      |
| coral1 | c8058/f2p0/1919  | WRKY     |
| coral1 | c100391.graph_c0 | WRKY     |
| coral1 | c87064.graph_c0  | WRKY     |
| coral1 | c119047.graph_c1 | WRKY     |
| coral1 | c124558.graph_c1 | WRKY     |

---

Supplementary Figure S1-S5

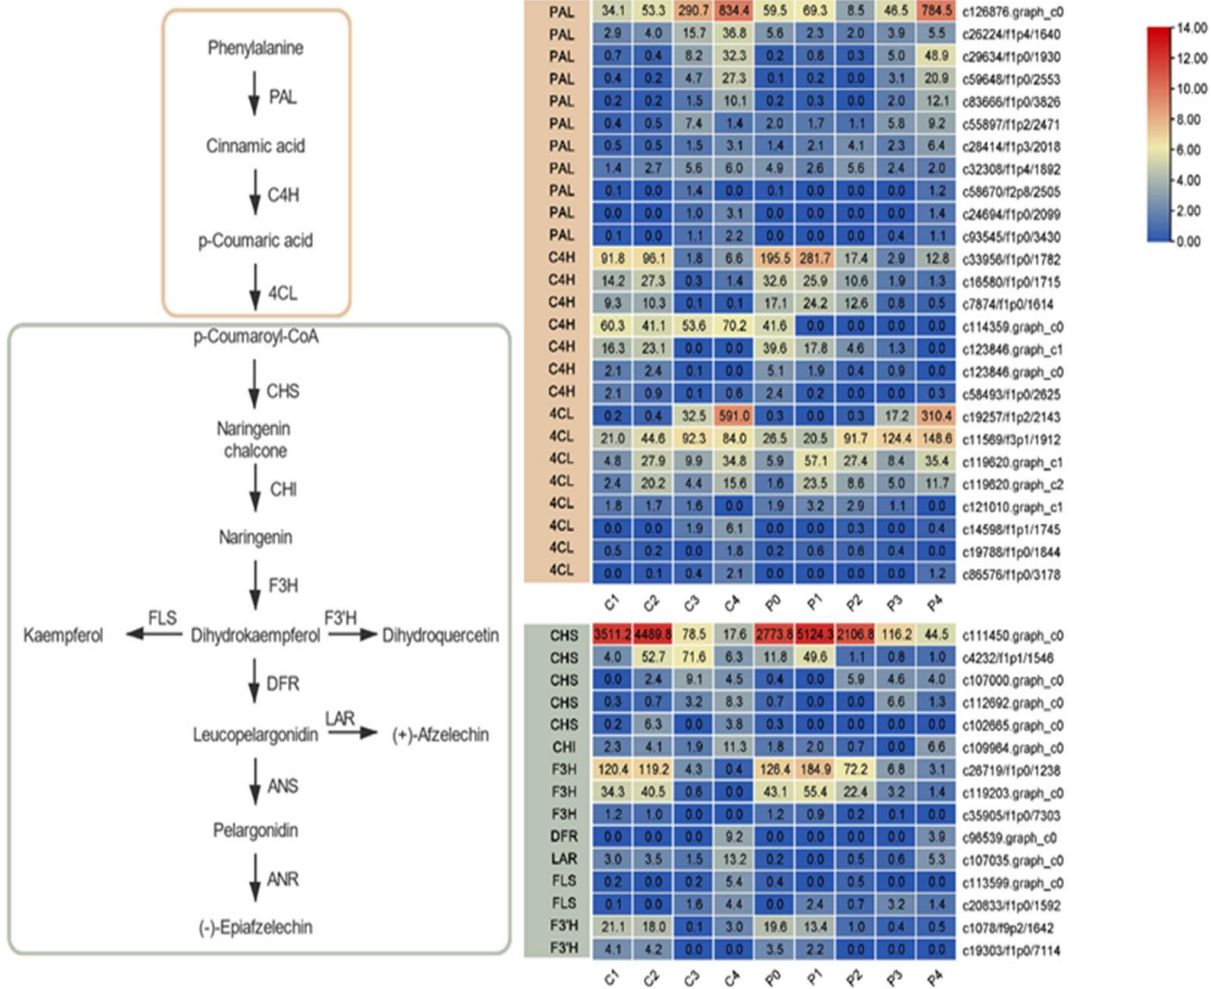

Supplementary Figure S1. The expression patterns analysis of genes related to flavonoids metabolic pathway in petals and coronas of narcissus

The red box in the left panel represents the phenylpropanoid biosynthesis pathway, and the gray box represents the flavonoid biosynthesis pathway. The heat map shows the expression patterns of differentially expressed genes related to flavonoids metabolic pathway in petals and coronas at different periods. Enzyme names are shown on the left side of the heat map. Enzymes in the phenylpropanoid biosynthesis are shown in red background and enzymes in the flavonoid biosynthesis pathway are shown in gray. The FPKM values of genes were labeled on the heat map.

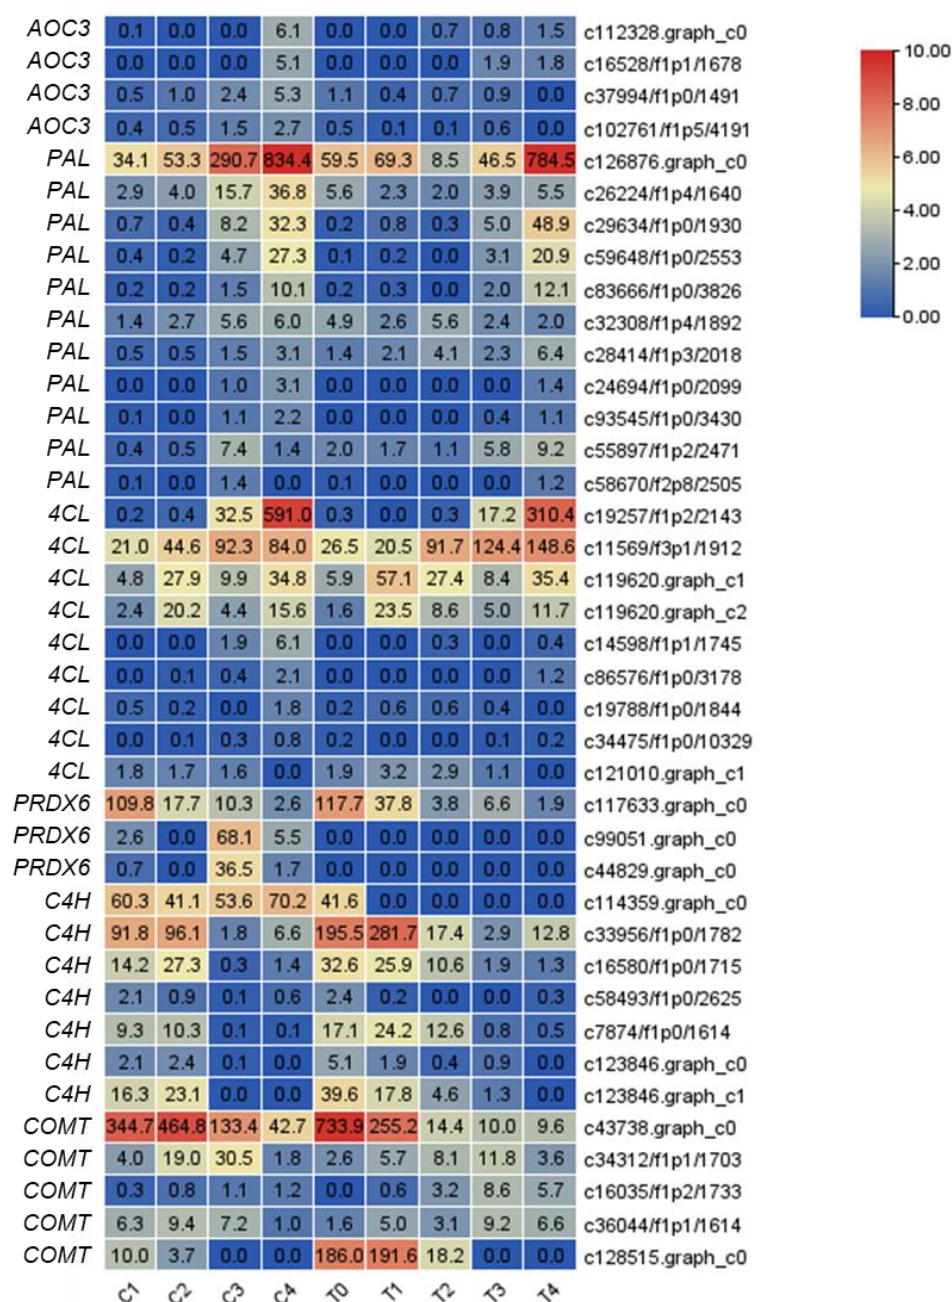

Supplementary Figure S2 The expression patterns analysis of genes related to phenylpropanoid biosynthesis in tepals and coronas of narcissus

The red box in the left panel represents the phenylpropanoid biosynthesis pathway, and the gray box represents the flavonoid biosynthesis pathway. The heat map shows the expression patterns of differentially expressed genes related to phenylpropanoid biosynthesis pathway in tepals and coronas at different periods. Enzyme names are shown on the left side of the heat map. The FPKM values of genes were labeled on the heat map.

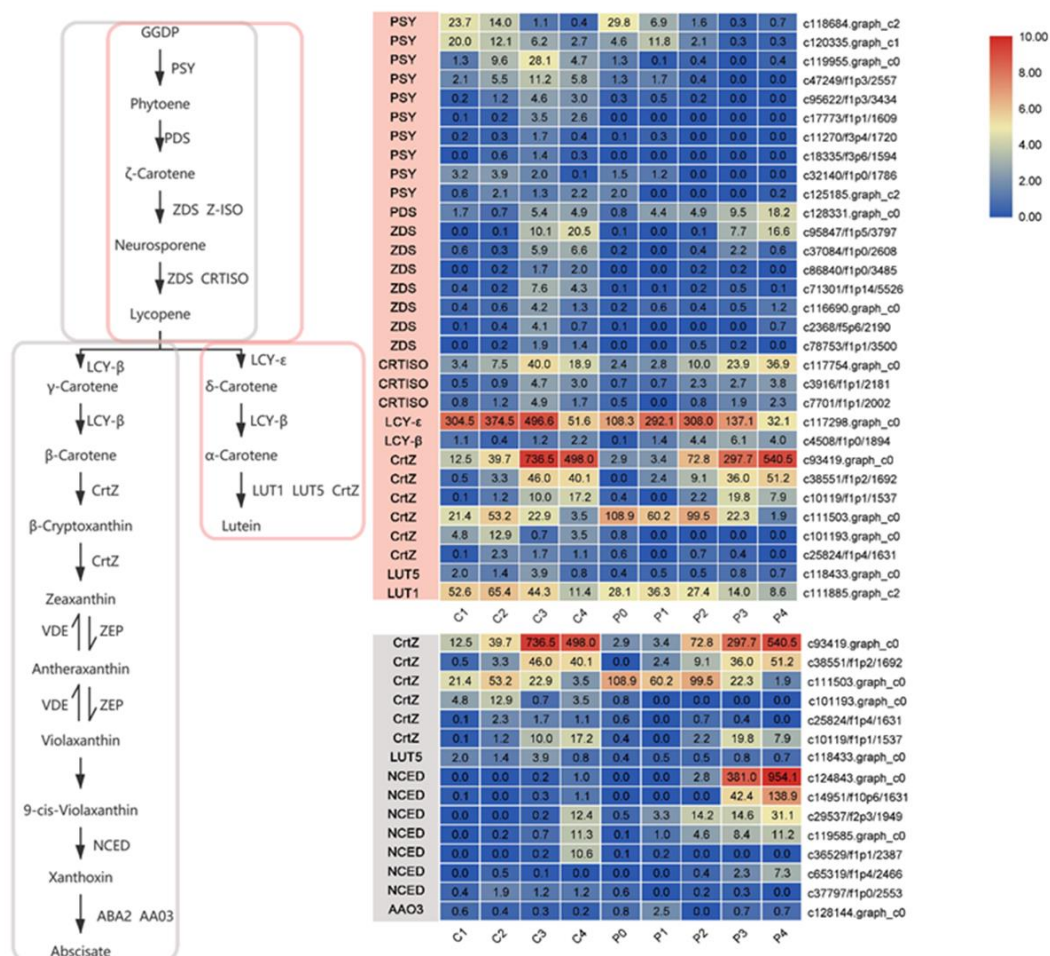

Supplementary Figure S3. The expression patterns analysis of genes related to carotenoids metabolic pathway in petals and coronas of Chinese narcissus

The pathway is divided into β-carotene and lutein synthesis sub-pathways based on the functions of unigenes. The red box in the left panel represents the carotenoid synthesis pathway, and the gray box represents the carotenoid degradation pathway. The heatmap shows the expression patterns of differentially expressed genes related to carotenoids metabolic pathway in petals and coronas at different periods. Enzyme names are shown on the left side of the heatmap. Enzymes in the carotenoid synthesis pathway are shown in red background and enzymes in the degradation pathway are shown in gray. The FPKM values of genes were labeled on the heatmap.



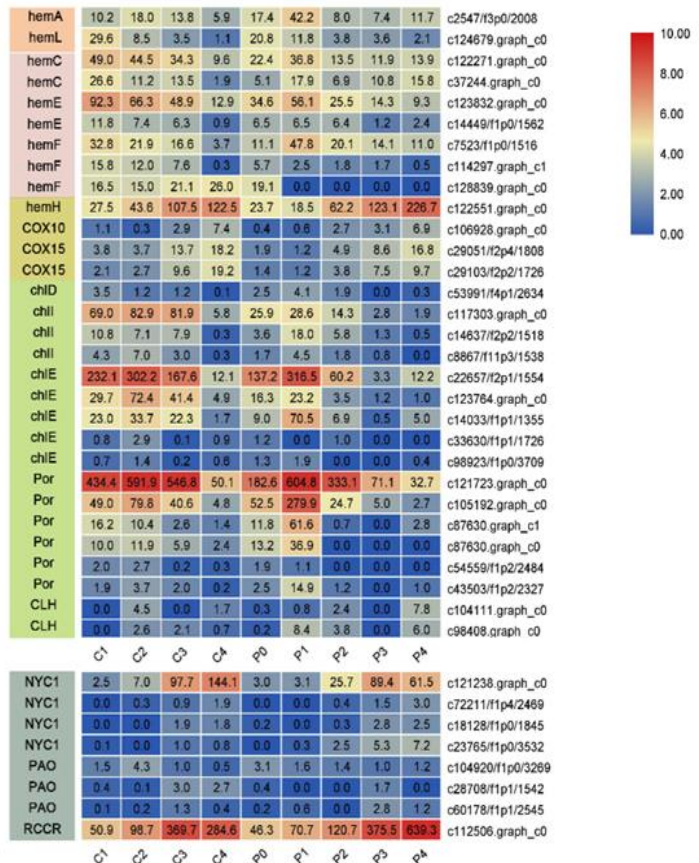

The pathway is divided into five associated parts (ALA formation, Proto IX formation, heme formation, chlorophyll formation, and chlorophyll breakdown) based on the functions of unigenes. The heat map shows the expression patterns of differentially expressed genes related to chlorophyll metabolic pathway in petals and coronas at different periods. The names of enzymes were shown on the left side of the heat map and different background colors represented different sub-pathways. From top to bottom, there were ALA formation, Proto IX, heme formation, chlorophyll formation and chlorophyll degradation pathway related enzymes. The FPKM values of genes were labeled on the heat map.

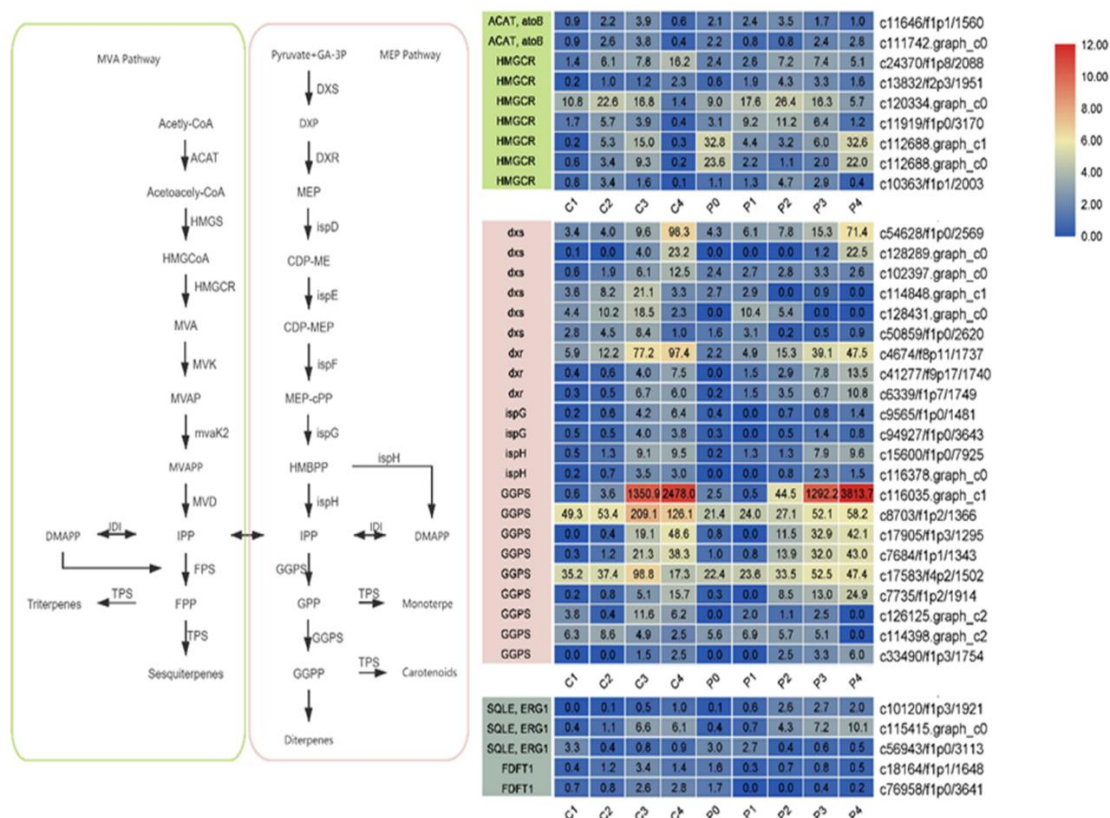

Supplementary Figure S5. The expression patterns analysis of genes related to terpenoid metabolic pathway in petals and coronas of narcissus

The pathway is divided into MVA pathway and MEP pathway based on the functions of unigenes. The green box in the left panel represents the MVA synthesis pathway, and the pink box represents the MEP synthesis pathway. The heat map shows the expression patterns of differentially expressed genes related to terpenoid metabolic pathway in petals and coronas at different periods. Enzyme names are shown on the left side of the heat map. Enzymes in MVA pathway are shown in red background, enzymes in the MEP pathway are shown in pink background, and enzymes related to monoterpenes and sesquiterpenes are in grey-green. The FPKM values of genes were labeled on the heat map.

(A)

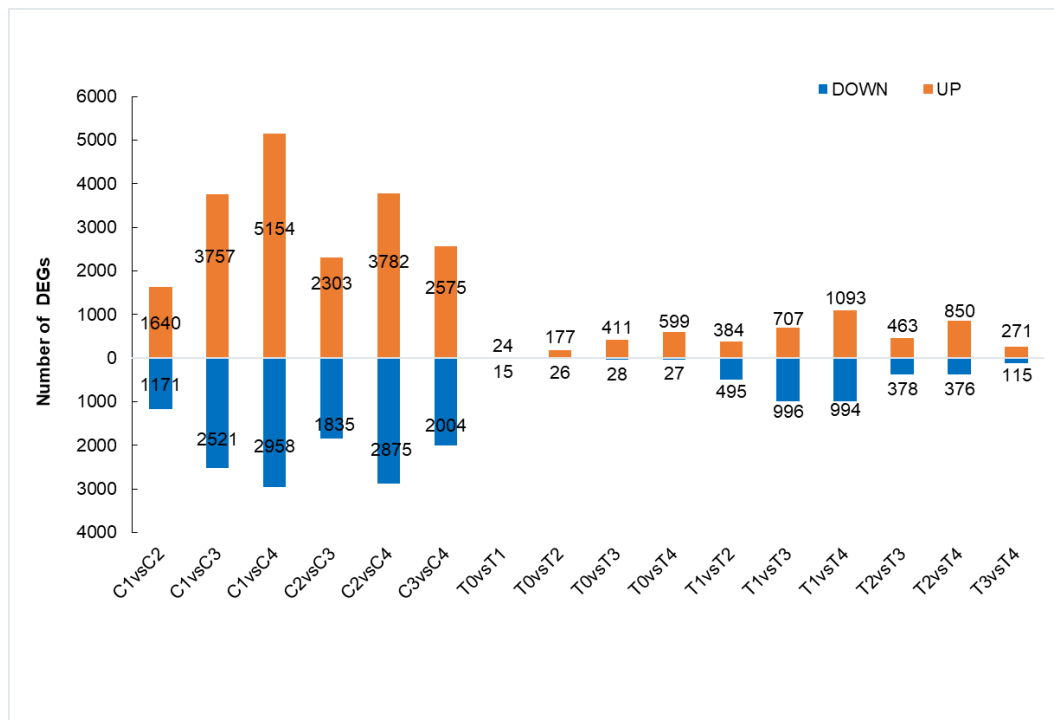

(B)

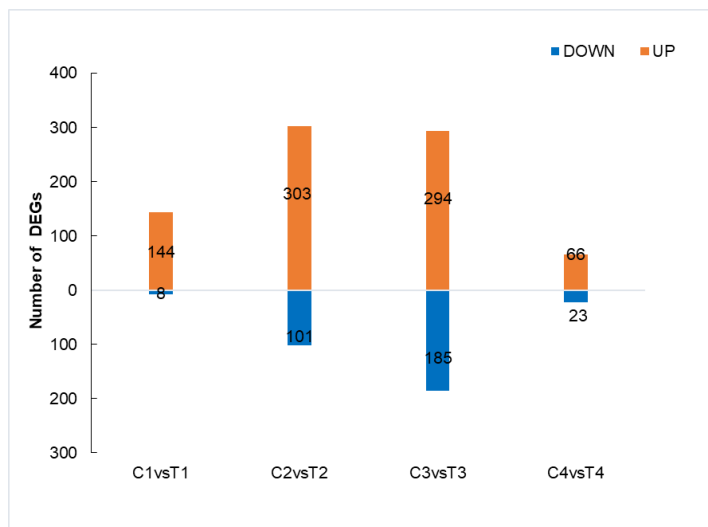

Supplementary Figure S6. Analysis of differentially expressed transcription factor genes in the tepal and corona of narcissus. (A) Number of up and down-regulated genes in petals or coronas of narcissus at different periods; (B) Number of up and down-regulated genes between petals and corollas of narcissus at the same periods.
